# Supplementary material for: Rapid room-temperature preparation of MoO3−x quantum dots by ultraviolet irradiation for photothermal treatment and glucose detection
Source: Royal Society of Chemistry journal article supplement (doi:10.1039/c8nj04105a), 2018-01-01
Supplement: c8nj04105a1.pdf [file c8nj04105a1.pdf]

## Supporting information

### **Rapid room-temperature preparation of $\text{MoO}_{3-x}$ quantum dots by ultraviolet irradiation for photothermal treatment and glucose detection**

Hongru Zu<sup>a</sup>, Yingliang Liu<sup>b,\*</sup>, Yanxian Guo<sup>c</sup>, Haiyao Yang<sup>c</sup>, Di Huang<sup>a</sup>, Zhiming Liu<sup>c</sup>, Chaofan Hu<sup>b,\*</sup>

<sup>a</sup> College of Mechanic, Taiyuan University of Technology, Taiyuan 030024, China.

<sup>b</sup> College of Materials and Energy, South China Agricultural University, Guangzhou 510642, China.

<sup>c</sup> College of Biophoton, MOE Key Laboratory Laser Life Science, South China Normal University, Guangzhou 510631, China.

\*Corresponding author.

E-mail addresses: thucf@scau.edu.cn (C. Hu), tliuyl@scau.edu.cn (Y. Liu).

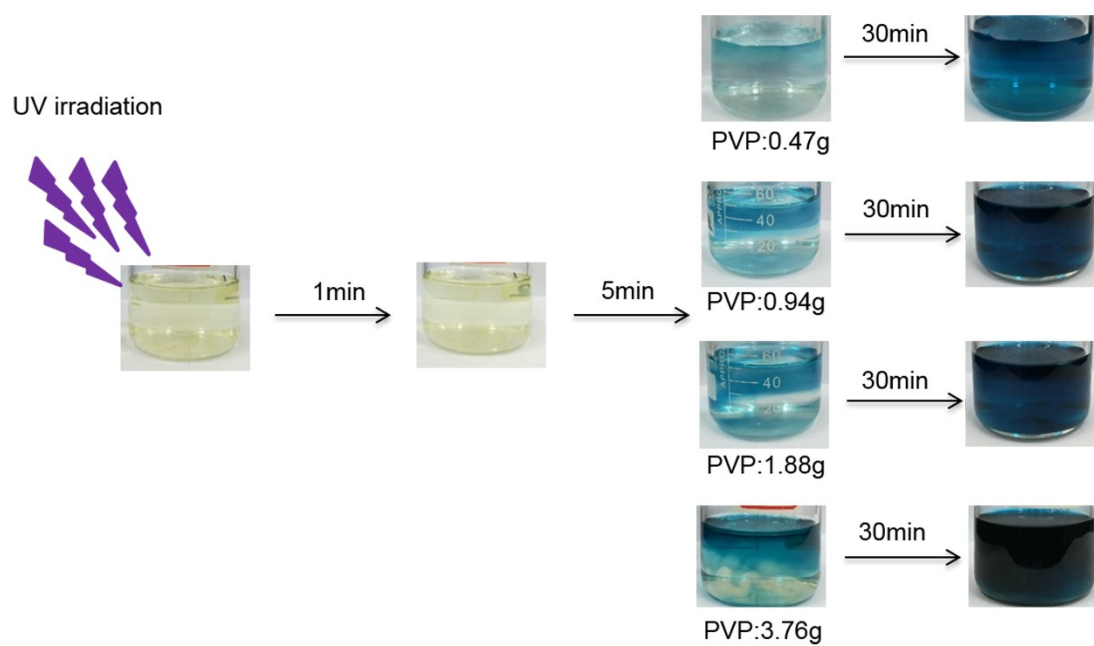

**Fig. S1** The change in color of products formed under UV lamp in different time with different amount of PVP.

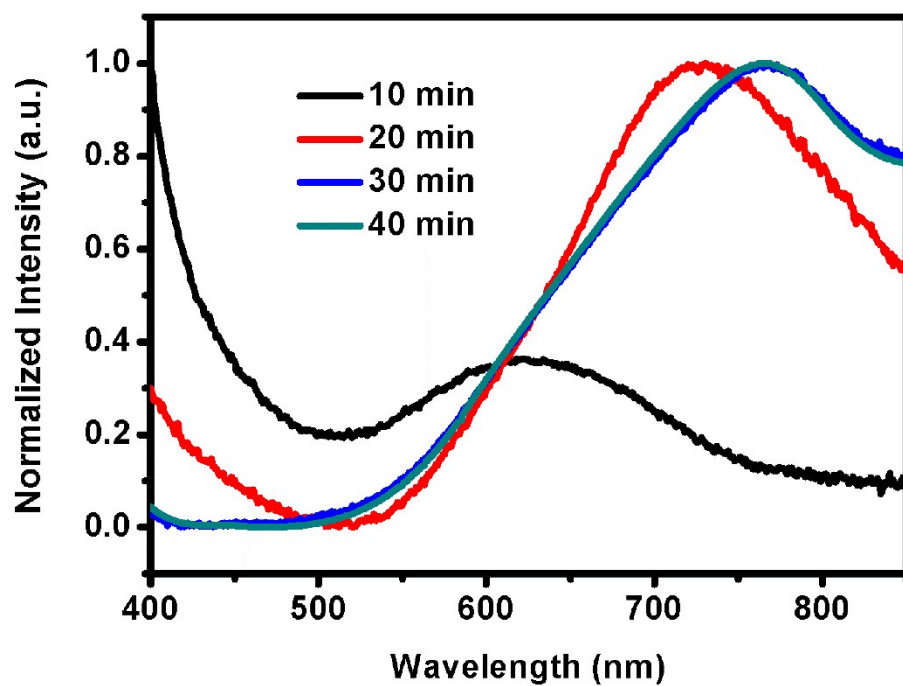

**Fig. S2** UV-vis absorbance spectra of  $(\text{NH}_4)_6\text{Mo}_7\text{O}_{24} \cdot 4\text{H}_2\text{O}$  react with PVP for different time.

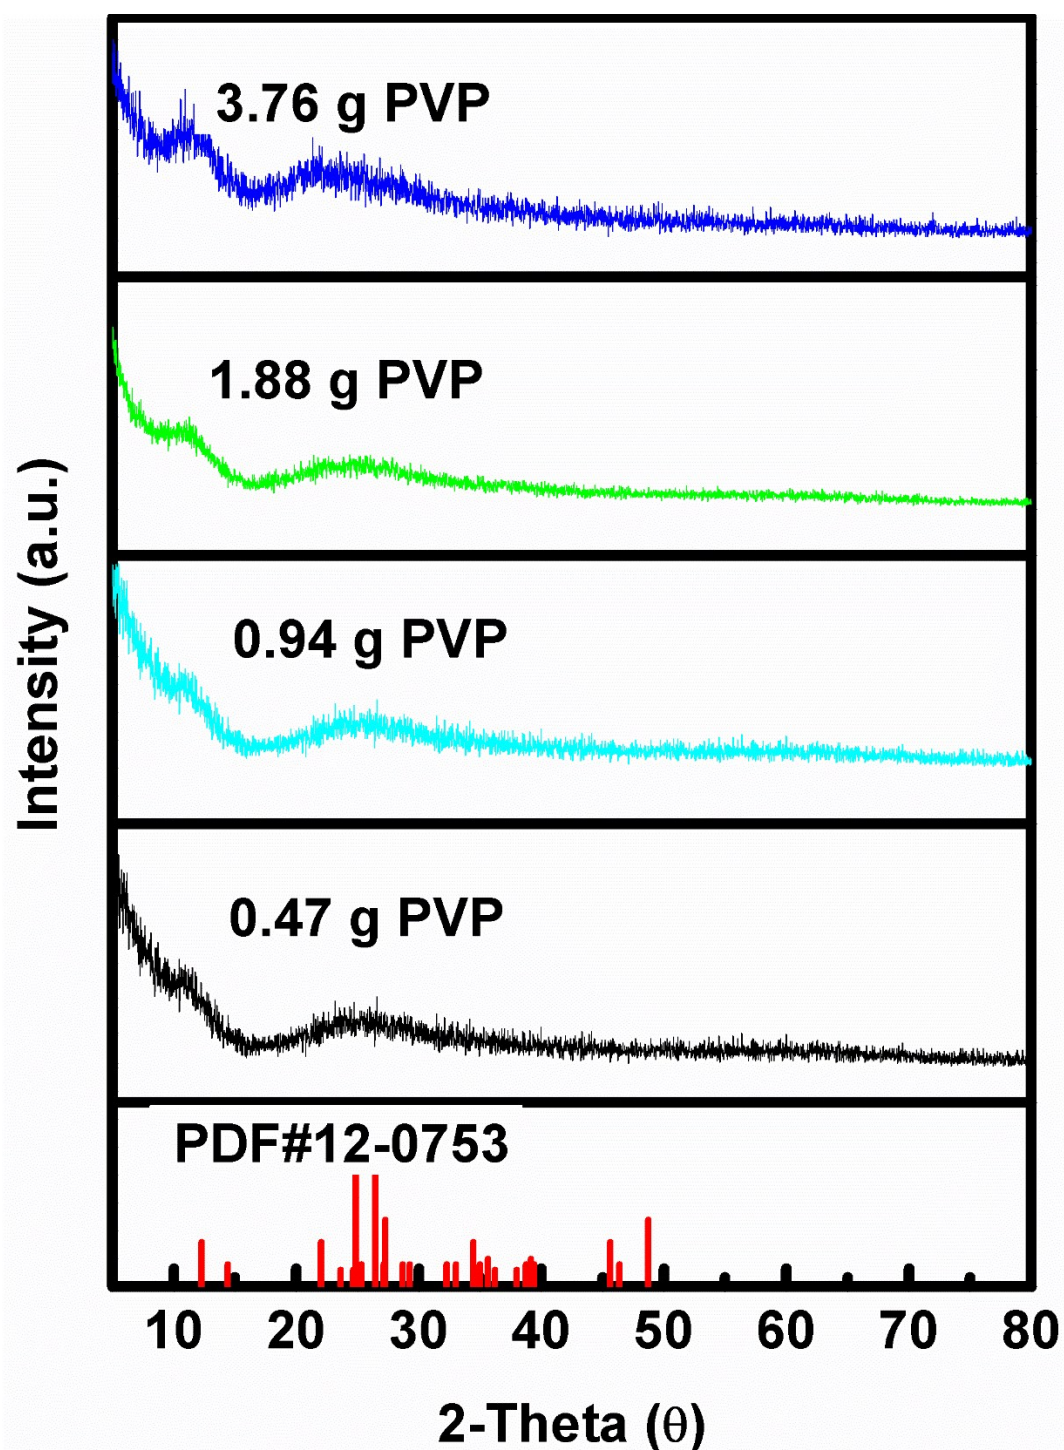

**Fig. S3** XRD pattern of as-prepared  $\text{MoO}_{3-x}$  QDs sample, of which standard PDF card for JCPDs no. 12-0753.

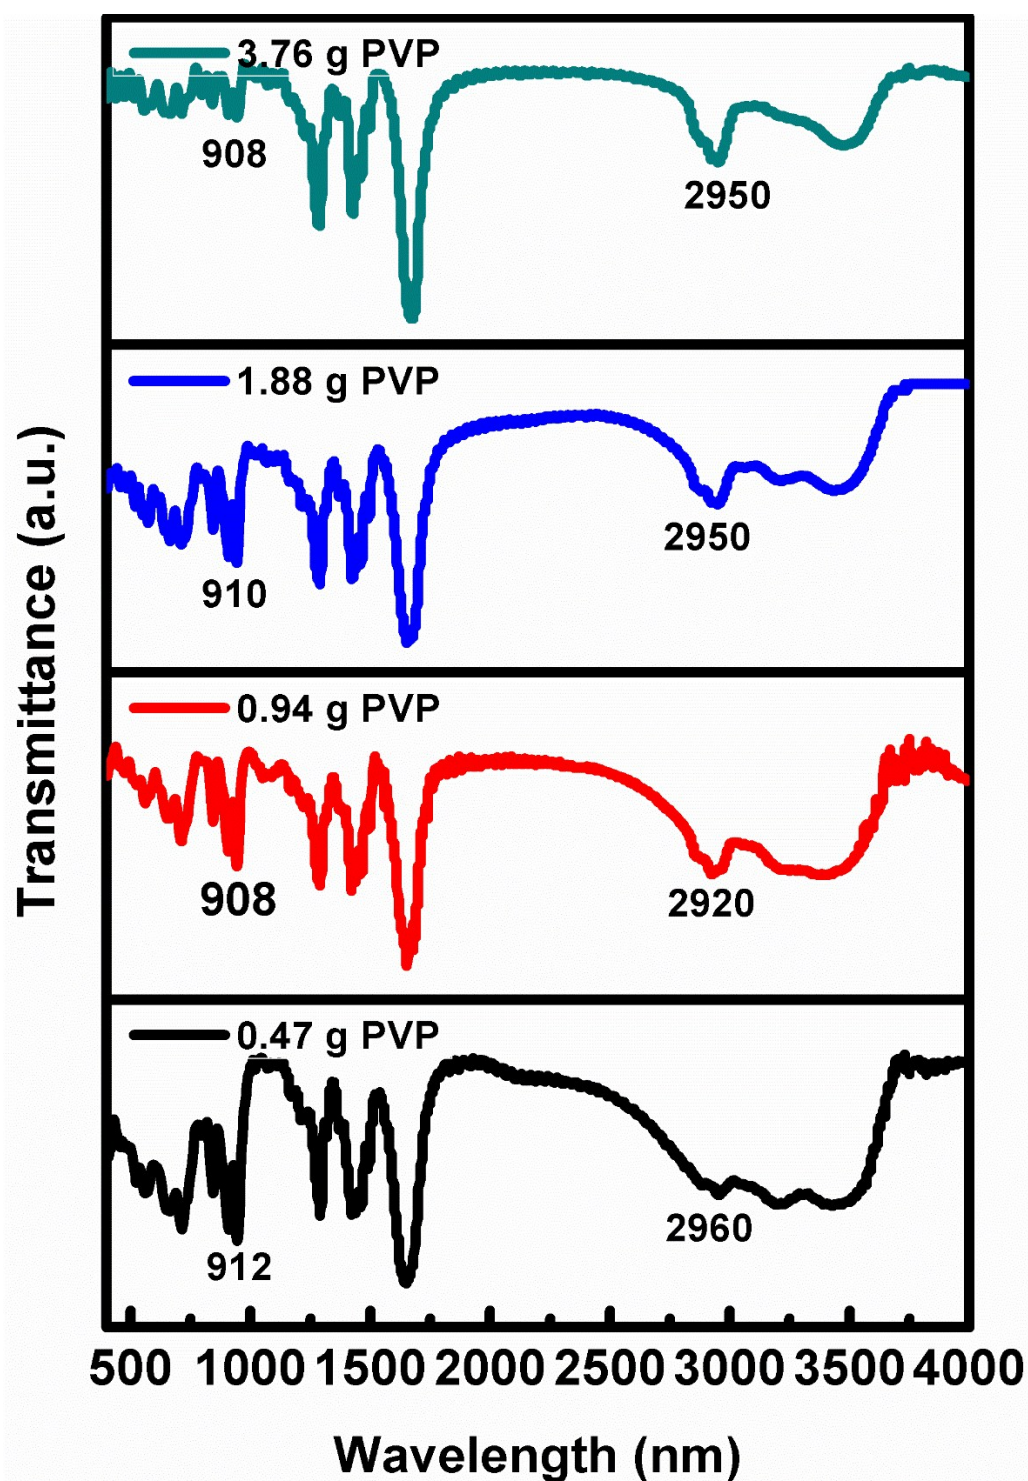

Fig. S4 FT-IR spectrum with different amount of PVP.



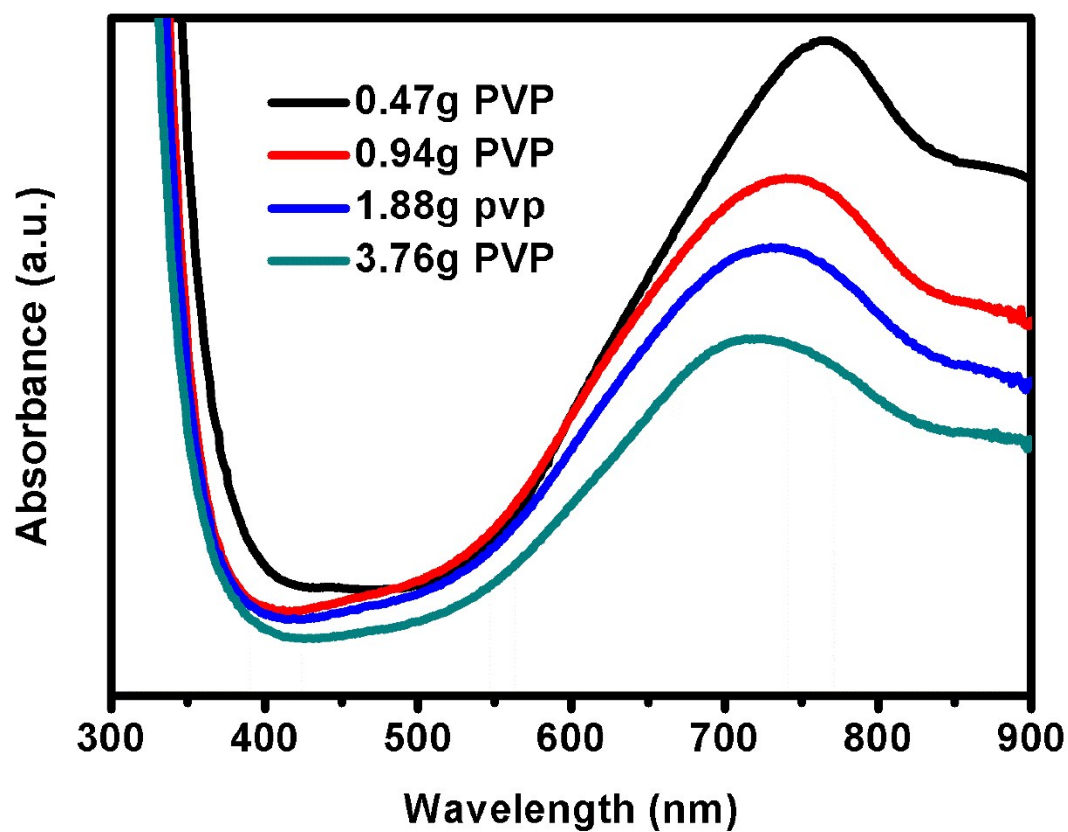

Fig. S5 UV-vis absorption spectra of  $\text{MoO}_{3-x}$  QDs with different amount of PVP.

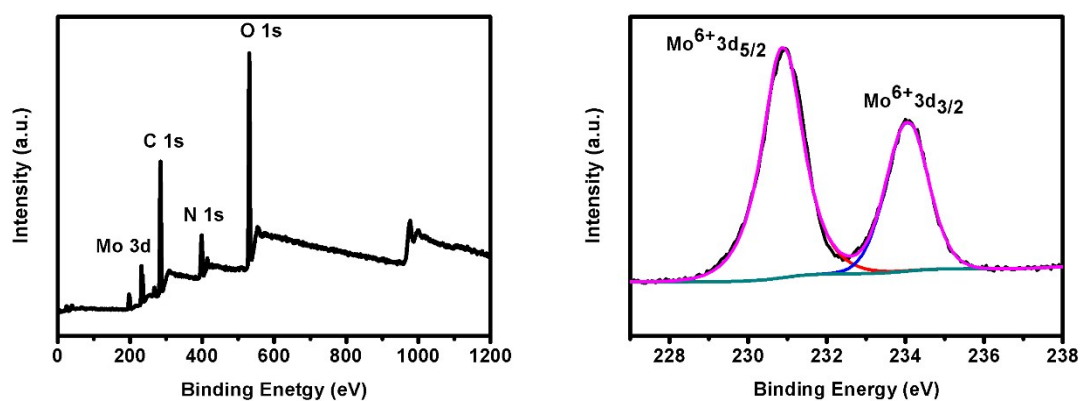

Fig. S6 XPS spectrum after the glucose concentration detection. (a) The full range of XPS spectra. (b) Mo3d spectrum shows that the valence state of Mo ion is +6.
